RESEARCH ARTICLE

# Intranasal Volume Changes Caused by the Endoscopic Endonasal Transsphenoidal Approach and Their Effects on Nasal Functions

Do Hyun Kim<sup>1</sup>, Yong-Kil Hong<sup>2</sup>, Sin-Soo Jeun<sup>2</sup>, Yong Jin Park<sup>1</sup>, Soo Whan Kim<sup>1</sup>, Jin Hee Cho<sup>1</sup>, Boo Young Kim<sup>1</sup>, Sungwoo Han<sup>1</sup>, Yong Joo Lee<sup>1</sup>, Jae Hyung Hwang<sup>1</sup>, Sung Won Kim<sup>1\*</sup>

**1** Department of Otolaryngology-Head and Neck Surgery, Seoul St. Mary's Hospital, College of Medicine, The Catholic University of Korea, Seoul, Korea, **2** Department of Neurosurgery, Seoul St. Mary's Hospital, College of Medicine, The Catholic University of Korea, Seoul, Korea

\* [kswent@catholic.ac.kr](mailto:kswent@catholic.ac.kr)

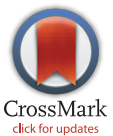

OPEN ACCESS

**Citation:** Kim DH, Hong Y-K, Jeun S-S, Park YJ, Kim SW, Cho JH, et al. (2016) Intranasal Volume Changes Caused by the Endoscopic Endonasal Transsphenoidal Approach and Their Effects on Nasal Functions. PLoS ONE 11(3): e0151531. doi:10.1371/journal.pone.0151531

**Editor:** Giovanni Grasso, Universita degli Studi di Palermo, ITALY

**Received:** November 1, 2015

**Accepted:** February 28, 2016

**Published:** March 24, 2016

**Copyright:** © 2016 Kim et al. This is an open access article distributed under the terms of the [Creative Commons Attribution License](https://creativecommons.org/licenses/by/4.0/), which permits unrestricted use, distribution, and reproduction in any medium, provided the original author and source are credited.

**Data Availability Statement:** All data files are available on FigShare: <https://dx.doi.org/10.6084/m9.figshare.3082000.v1>.

**Funding:** Funding was obtained from a National Research Foundation of Korea grant from the Ministry of Science, ICT, and Future Planning (No. 2014R1A2A2A01004325) and the Korea Health Industry Development Institute funded by the Ministry of Health and Welfare (HI14C3228). The funders had no role in study design, data collection and analysis, decision to publish, or preparation of the manuscript.

## Abstract

### Objective

We evaluated postoperative changes in nasal cavity volume and their effects on nasal function and symptoms after endoscopic endonasal transsphenoidal approach for antero-central skull base surgery.

### Study Design

Retrospective chart review at a tertiary referral center.

### Methods

We studied 92 patients who underwent binostril, four-hand, endoscopic endonasal transsphenoidal approach surgery using the bilateral modified nasoseptal rescue flap technique. Pre- and postoperative paranasal computed tomography and the Mimics<sup>®</sup> program were used to assess nasal cavity volume changes at three sections. We also performed several pre- and postoperative tests, including the Connecticut Chemosensory Clinical Research Center test, Cross-Cultural Smell Identification Test, Nasal Obstruction Symptoms Evaluation, and Sino-Nasal Outcome Test-20. In addition, a visual analog scale was used to record subjective symptoms. We compared these data with the pre- and postoperative nasal cavity volumes.

### Results

Three-dimensional, objective increases in nasal passage volumes were evident between the inferior and middle turbinates ( $p < 0.001$ ) and between the superior turbinate and choana ( $p = 0.006$ ) postoperatively. However, these did not correlate with subjectively assessed

**Competing Interests:** The authors have declared that no competing interests exist.

symptoms (NOSE, SNOT-20 and VAS; all nasal cavity areas;  $p \geq 0.05$ ) or olfactory dysfunction (CCCRC and CCSIT test; all nasal cavity areas;  $p \geq 0.05$ ).

## Conclusion

Skull base tumor surgery via an endoscopic endonasal transsphenoidal approach altered the patients' nasal anatomy, but the changes in nasal cavity volumes did not affect nasal function or symptoms. These results will help surgeons to appropriately expose the surgical field during an endoscopic endonasal transsphenoidal approach.

## Introduction

The endoscopic endonasal transsphenoidal approach (EETSA) for cranial base surgery is the standard surgical method for sellar tumors[1,2]. The two-nostrils/four-hands technique was introduced to improve the manipulability of surgical instruments and increase the accessibility of the lateral sellar region[3]. Cerebrospinal fluid (CSF) leakage is an important complication after EETSA, although the incidence of CSF leakage decreased after Hadad *et al.*[4] introduced the nasoseptal flap concept[4,5]. For most sellar tumors, no intraoperative CSF leak is expected and the use of a nasoseptal flap may cause several complications, including nasal crusting, discharge, olfactory disorders, and longer operating times for complex cases[6,7]. Therefore, Rivera-Serrano *et al.*[8] introduced the nasoseptal "rescue" flap to reduce morbidity. This rescue flap can be harvested when sellar reconstruction is needed to close a resultant defect larger than expected or when there is unexpected CSF leakage. The technique consists of partially harvesting the superior and posterior ends of the flap to preserve its vascular pedicle and provides proper access to the sella during EETSA[8].

As EETSA has replaced a microscopic approach[1,2] and the number of EETSA surgeries featuring nasoseptal and nasoseptal rescue flaps has increased, the complications such as olfactory dysfunction after EETSA and postoperative quality of life have received attention[9,10]. Previously, we evaluated the change in olfactory function and nasal symptoms after EETSA [11,12]. In these studies, we evaluated that EETSA contribute to olfactory dysfunction and affect nasal symptoms independent of surgical type. So we decided to evaluate the changes of nasal function and symptoms after EETSA using scientific and objective method. Thus, we measured the change of nasal cavity volume and identified correlation between the change of nasal function and symptoms.

We used paranasal sinus computed tomography (PNS CT) and the Mimics<sup>®</sup> program to reconstruct the postoperative three-dimensional (3D) changes in the nasal cavity. We explored the impact of such changes on nasal function and symptoms, using the Connecticut Chemosensory Clinical Research Center (CCCRC) test, Cross-Cultural Smell Identification Test (CCSIT), Nasal Obstruction Symptoms Evaluation (NOSE), Sino-Nasal Outcome Test-20 (SNOT-20), and a visual analog scale (VAS) assessing several nasal symptoms.

## Materials and Methods

This study was approved by the Institutional Review Board of Seoul St. Mary's Hospital, and all individuals signed informed consent forms. Between November 2010 and November 2014, 331 patients with anterior and central skull base tumors underwent surgery via EETSA at Seoul St. Mary's Hospital (Catholic University of Korea, Seoul, South Korea). As a retrospective

study design, we excluded 47 patients with a history of sinonasal surgery, a history of olfactory disturbances before EETSA surgery, asthma, or sinonasal diseases. We also excluded 67 patients who did not undergo postoperative PNS CT and 78 patients who did not complete the pre- or postoperative CCCRC test, CCSIT, NOSE, SNOT-20, and VAS. The postoperative PNS CT and CCCRC test, CCSIT, NOSE, SNOT-20, and VAS scores were evaluated at least 6 months postoperatively. Moreover, 47 patients who did not undergo binostril four-hand EETSA with bilateral modified nasoseptal rescue flaps[13] were excluded. In this way, we ensured that all patients underwent identical surgeries. In this surgical method, the inferior, middle, and superior turbinates were preserved and lateralized, and posterior bony septum that included a portion of the perpendicular plate of the ethmoid bone, the vomer, and the anterior wall of the sphenoidal sinus was removed. Concomitant septoplasty was not done, and a posterior ethmoidectomy was included for wider sphenoid exposure[13]. Ultimately, the study enrolled 92 patients. All EETSA surgeries were performed by a single surgeon (S.W. Kim). After the approach procedure was finished, neurosurgery team of two surgeons performed tumor removal with binostril, four-hand technique.

Paranasal sinus CT was performed in the axial projection. During the evaluation, each patient lay supine on the scanner bed. Images were obtained at 120 kV and 180 mA over 7 s. Serial 0.6-mm-thick axial images were acquired and 1-mm-thick coronal images were reconstructed. All imaging was performed at the same original setting and Hounsfield unit (HU) (non-enhanced bone shadow; window, 2,000 HU; level, 400 HU).

Three-dimensional reconstruction was performed using Mimics®. We divided the nasal cavity in three areas. The coronal boundary was defined at the level of the anterior end of the inferior (the nasal valve), middle, and superior turbinates and choana. The borders of the nasal cavity mucosa and air were determined automatically by the Mimics® program using HU differences. The nasal cavity volume was calculated and reported in mm<sup>3</sup> (Fig 1).

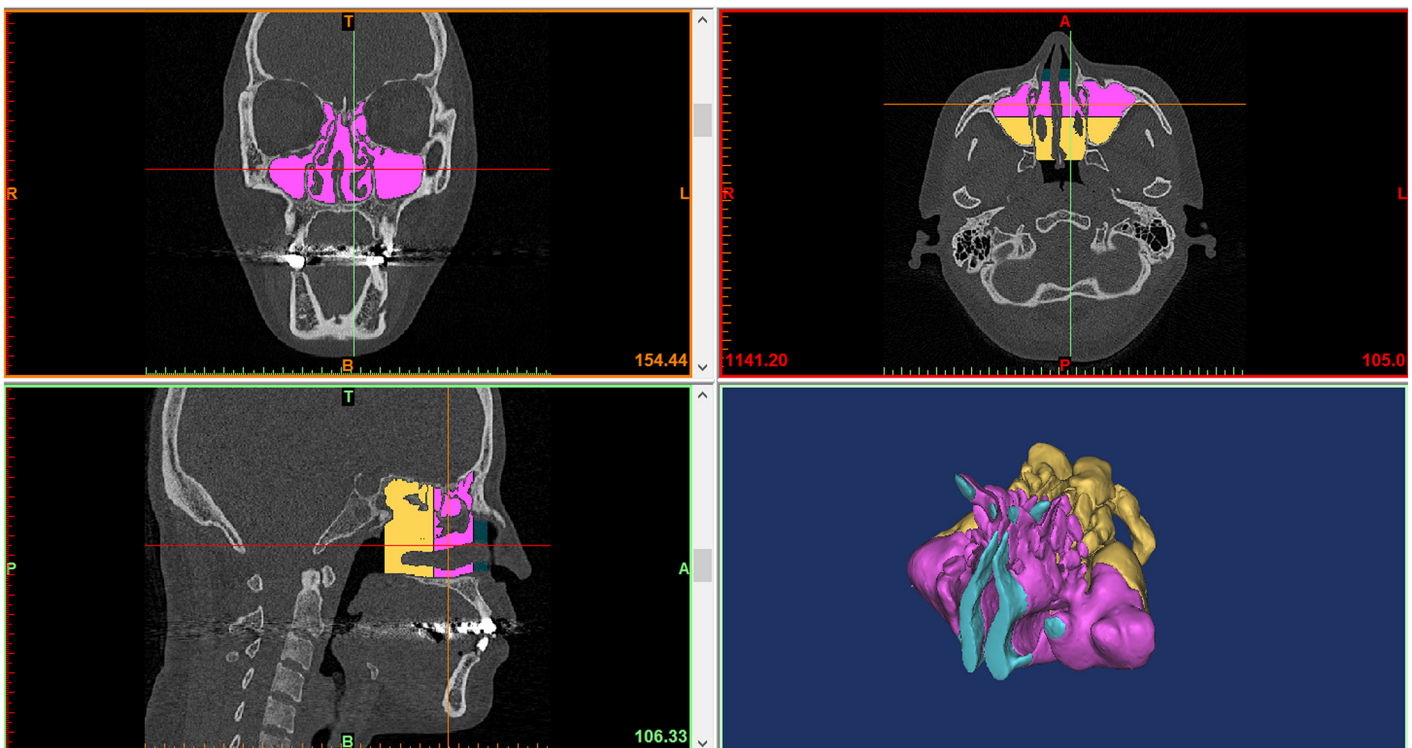

**Fig 1. Nasal cavity volume measurement using Mimics®.**

doi:10.1371/journal.pone.0151531.g001

**Table 1. Types of tumors resected via EETSA.**

|                                        | Number of patients | Percentage (%) |
|----------------------------------------|--------------------|----------------|
| Pituitary macroadenoma                 | 77                 | 83.7           |
| Rathke's cleft cyst                    | 5                  | 5.4            |
| Meningiomas                            | 3                  | 3.3            |
| Chordoma                               | 2                  | 2.2            |
| Craniopharyngioma                      | 2                  | 2.2            |
| Carvenous sinus tumor                  | 1                  | 1.1            |
| Granular cell tumor of neurohypophysis | 1                  | 1.1            |
| Pseudocyst of pituitary gland          | 1                  | 1.1            |

doi:10.1371/journal.pone.0151531.t001

The CCCRC test used 1-butanol dissolved in mineral oil, as reported previously[14]. Commencing with a 1-butanol concentration of 4% (v/v) (dilution step 0), nine successive three-fold dilutions were prepared. The threshold was defined as the dilution at which the alcohol was identified in four consecutive trials. The CCSIT is a scratch-and-sniff test of twelve micro-encapsulated odorants with a forced choice of four alternatives per item[15]. Nasal symptoms were evaluated using the NOSE[16,17] and SNOT-20[18]; nasal stuffiness, sneezing, rhinorrhea, snoring, headache, facial pain, and olfactory changes were scored subjectively using a VAS (each score ranged from 0 to 10). Higher scores indicated more severe nasal symptoms.

All data are expressed as means ± standard deviation. The paired Student's *t*-test was used to compare pre- and postoperative changes in the nasal cavity volume, and Pearson correlation coefficients were calculated to explore relationships between the nasal cavity volume changes and the CCCRC test, CCSIT, NOSE, SNOT-20, and VAS scores. A *p*-value <0.05 was considered to indicate statistical significance. All statistical analyses were conducted using SAS software (ver. 9.3; SAS Institute, Cary, NC, USA).

## Results

The study enrolled 92 patients, with a mean age of 47.1 years (range: 20–73 years); there were 51 (55%) males and 41 (45%) females. Table 1 shows types of tumors resected via EETSA. Pituitary macroadenoma were found in 77 patients (83.7%), Rathke's cleft cyst in 5 patients (5.4%), meningioma, chordoma and craniopharyngioma in 2 patients (2.2%), tuberculum sellae meningioma, carvenous sinus tumor, granular cell tumor of neurohypophysis and pseudocyst of pituitary gland in 1 patients (1.1%).

Postoperative volume changes in the nasal cavity were measured from the anterior end of the inferior turbinate to the middle turbinate (Area 1), from the middle turbinate to the superior turbinate (Area 2), and from the superior turbinate to the choana (Area 3) (Table 2).

**Table 2. Differences between the pre- and postoperative nasal cavity volumes.**

|                              | Preoperative            |          | Postoperative           |          | <i>p</i> -value |
|------------------------------|-------------------------|----------|-------------------------|----------|-----------------|
|                              | Mean (mm <sup>3</sup> ) | SD       | Mean (mm <sup>3</sup> ) | SD       |                 |
| 1. Inferior-middle turbinate | 6054.78                 | 4358.06  | 7008.93                 | 4744.54  | <.001*          |
| 2. Middle-superior turbinate | 27178.62                | 11128.87 | 27385.39                | 9757.11  | 0.801           |
| 3. Superior turbinate-choana | 27025.21                | 11064.44 | 29485.73                | 10621.32 | 0.006*          |

\**P*<0.05 for the test.

SD, standard deviation

doi:10.1371/journal.pone.0151531.t002

**Table 3. Correlation between CCCRC, CCSIT and nasal cavity volume changes.**

|                              | Score differences between pre and postoperative assessments |         |        |         |
|------------------------------|-------------------------------------------------------------|---------|--------|---------|
|                              | CCCRC                                                       |         | CCSIT  |         |
|                              | r                                                           | p-value | r      | p-value |
| 1. Inferior–middle turbinate | −0.004                                                      | 0.968   | 0.024  | 0.818   |
| 2. Middle–superior turbinate | −0.07                                                       | 0.505   | −0.042 | 0.692   |
| 3. Superior turbinate–choana | 0.009                                                       | 0.929   | 0.108  | 0.304   |

CCCRC, Connecticut Chemosensory Clinical Research Center test; CCSIT, Cross-Cultural Smell Identification Test; r, Pearson correlation coefficient

doi:10.1371/journal.pone.0151531.t003

Increases in nasal volume after EETSA surgery were evident in Areas 1 ( $p < 0.001$ ) and 3 ( $p = 0.006$ ), while no significant difference was evident in Area 2 ( $p = 0.801$ ). The CCCRC test and CCSIT were used to evaluate pre- and postoperative olfactory function. No significant correlation between the CCCRC or CCSIT scores and nasal volume changes was evident in any area after EETSA surgery (Table 3). No significant correlation was seen between the pre- and postoperative NOSE and SNOT-20 scores and changes in volume within the nasal cavity (Table 4). We analyzed each VAS item in terms of the changes in nasal volume (Table 5). No significant correlation was evident between any change in volume in the three divided nasal cavity area and VAS items.

## Discussion

The EETSA to antero-central skull base tumors has reduced morbidity compared with previous surgical methods, while increasing the patient’s expectation of maintaining quality of life after surgery. The EETSA procedures include lateralization of the turbinates and a posterior ethmoidectomy for wider sphenoid exposure. A surgeon might hesitate if these widening procedures influenced postoperative complications. Decreased olfactory function is an important complication. The olfactory mucosa lies in the superior aspect of the nasal vault, overlying the superior nasal septum, cribriform plate, superior aspect of the superior turbinate, and medial surface of the middle turbinate [19]. However, the curvilinear incision using bilateral modified nasoseptal rescue flaps is remote from the olfactory neuroepithelium [13,20]. Therefore,

**Table 4. Correlation between the NOSE and SNOT-20 and nasal cavity volume changes.**

|                              | Score differences between the pre- and postoperative assessments |         |         |         |
|------------------------------|------------------------------------------------------------------|---------|---------|---------|
|                              | NOSE                                                             |         | SNOT-20 |         |
|                              | r                                                                | p-value | r       | p-value |
| 1. Inferior–middle turbinate | 0.013                                                            | 0.902   | 0.047   | 0.66    |
| 2. Middle–superior turbinate | 0.123                                                            | 0.244   | 0.059   | 0.576   |
| 3. Superior turbinate–choana | −0.108                                                           | 0.306   | −0.027  | 0.795   |

\* $P < 0.05$  for the test.

NOSE, Nasal Obstruction Symptoms Evaluation; SNOT-20, Sino-Nasal Outcome Test-20; r, Pearson correlation coefficient

doi:10.1371/journal.pone.0151531.t004

**Table 5. Correlation between VAS score and nasal cavity changes.**

| Pre-post op. VAS item | Nasal cavity area |                |                |
|-----------------------|-------------------|----------------|----------------|
|                       | 1. Inf.–Middle    | 2. Middle–Sup. | 3. Sup.–Choana |
| <b>Q1</b>             |                   |                |                |
| r                     | −0.006            | −0.098         | 0.056          |
| p-value               | 0.952             | 0.351          | 0.596          |
| <b>Q2</b>             |                   |                |                |
| r                     | −0.059            | −0.026         | −0.016         |
| p-value               | 0.579             | 0.808          | 0.883          |
| <b>Q3</b>             |                   |                |                |
| r                     | −0.148            | −0.16          | 0.065          |
| p-value               | 0.161             | 0.127          | 0.537          |
| <b>Q4</b>             |                   |                |                |
| r                     | 0.026             | 0.082          | −0.015         |
| p-value               | 0.804             | 0.438          | 0.884          |
| <b>Q5</b>             |                   |                |                |
| r                     | −0.105            | −0.064         | −0.156         |
| p-value               | 0.32              | 0.544          | 0.138          |
| <b>Q6</b>             |                   |                |                |
| r                     | 0.003             | 0.005          | −0.108         |
| p-value               | 0.98              | 0.959          | 0.304          |
| <b>Q7</b>             |                   |                |                |
| r                     | 0.062             | 0.025          | −0.076         |
| p-value               | 0.56              | 0.812          | 0.473          |

\*P<0.05 for the test.

VAS, visual analog scale; Inf., inferior turbinate; Middle, middle turbinate; Sup., superior turbinate; Pre-post op., differences between pre- and postoperative score;

Q1, nasal stuffiness; Q2, sneezing; Q3, rhinorrhea; Q4, snoring, Q5, headache; Q6, facial pain; Q7, olfactory change; r, Pearson correlation coefficient

doi:10.1371/journal.pone.0151531.t005

anatomical volume changes in the nasal cavity caused by EETSA surgery, and their effects on olfactory function and other nasal symptoms, have attracted considerable interest.

Several reports have showed that an increase in nasal cavity volume is associated with a decrease in olfactory function[21–23]. In the context of changes to the nasal cavity, several explanations have been suggested. As the nasal cavity below the middle turbinate increases in size, inspired air is shunted away from the olfactory area, resulting in olfactory dysfunction [22]. As the size of nasal cavity reservoir is increased, more air is trapped, interrupting the flow of odorants toward the olfactory receptors; the airflow may be diverted from the olfactory region mechanically or local airflow changes may develop near the olfactory clefts[23]. Moreover, a posterosuperior septal defect after EETSA surgery can affect airflow dynamics in the region of the olfactory cleft[24]. Nasal volume change may affect humidity and the temperature of, and the shear stress on, the wall of the olfactory neuroepithelium[11,25,26]. Proper widening of the nasal cavity, including lateralization of the inferior, middle, or superior turbinates or posterior ethmoidectomy, is required when approaching skull base tumors varying in size and location. However, the influence of the degree of change in nasal cavity volume on olfaction has not been determined. We found an objective increase in the volume of the postoperative nasal passage between the inferior turbinate and middle turbinate and between the superior

turbinate and choana. However, no correlation with subjective symptoms, including olfactory dysfunction, was evident. Binostril four-hand EETSA surgery using bilateral modified nasoseptal rescue flaps based on the anterior and middle skull base was developed to better expose the surgical field, reduce morbidity, and facilitate surgical instrument manipulation. Our study found that widening the surgical field was not associated with nasal functions or symptoms. In the future, we will examine postoperative changes and their effects on nasal function using computational fluid dynamics to measure airflow, temperature, and humidity.

Our study had several limitations and advantages. It enrolled a relatively large number of patients undergoing the same surgical procedure performed by a single surgeon, controlling the influence of surgical method and operator variables on outcomes. On the other hand, it also had some limitations. We examined nasal symptoms only once after surgery, at 6 months. In addition, the retrospective nature of the study renders the findings weaker than those afforded by randomized controlled studies. Also, most of our cases were pituitary tumors, and they might have lower rates of morbidity than the more expanded approaches required for tumors such as chordomas and meningiomas. However, the number of EETSA candidates with extensive tumors was too small to conduct sub-analysis investigating the relationship between the types of tumors and nasal symptoms. So, Future work should feature a larger group of patients with a longer follow-up period.

## Conclusions

Nasal cavity volumes increased after EETSA surgery, but these changes did not affect nasal function or symptoms. A wide, stable visual field and easy surgical instrument manipulation are important when performing surgery. This study confirmed that the surgical exposure using the bilateral modified nasoseptal rescue flap technique created during EETSA is suitable for antero-central skull base surgery.

## Acknowledgments

Funding was obtained from a National Research Foundation of Korea grant from the Ministry of Science, ICT, and Future Planning (No. 2014R1A2A2A01004325) and the Korea Health Industry Development Institute funded by the Ministry of Health and Welfare (HI14C3228). The funders had no role in study design, data collection and analysis, decision to publish, or preparation of the manuscript.

The English in this document has been checked by at least two professional editors, both native speakers of English. For a certificate, please see: <http://www.textcheck.com/certificate/RLECIJ>.

## Author Contributions

Conceived and designed the experiments: DHK Sung Won Kim. Performed the experiments: DHK Sung Won Kim YH SJ BYK SH YJL JHH. Analyzed the data: DHK Sung Won Kim YH SJ YJP Soo Whan Kim JHC. Contributed reagents/materials/analysis tools: DHK Sung Won Kim YH SJ YJP Soo Whan Kim JHC BYK SH YH YJL. Wrote the paper: DHK Sung Won Kim YH SJ YJP Soo Whan Kim JHC BYK SH YJL JHH. Revising the article critically for important intellectual content: Sung Won Kim YH SJ YJP Soo Whan Kim JHC BYK SH YJL JHH.

## References

1. Rotenberg B, Tam S, Ryu WH, Duggal N. Microscopic versus endoscopic pituitary surgery: a systematic review. *Laryngoscope*. 2010; 120:1292–1297. doi: [10.1002/lary.20949](https://doi.org/10.1002/lary.20949) PMID: [20578228](https://pubmed.ncbi.nlm.nih.gov/20578228/)

2. Strychowsky J, Nayan S, Reddy K, Farrokhyar F, Sommer D. Purely endoscopic transsphenoidal surgery versus traditional microsurgery for resection of pituitary adenomas: systematic review. *J Otolaryngol Head Neck Surg*. 2011; 40:175–185. PMID: [21453654](#).
3. Castelnuovo P, Pistochini A, Locatelli D. Different surgical approaches to the sellar region: focusing on the "two nostrils four hands technique". *Rhinology*. 2006; 44:2–7. PMID: [16550942](#).
4. Hadad G, Bassagasteguy L, Carrau RL, Mataza JC, Kassam A, Snyderman CH, et al. A novel reconstructive technique after endoscopic expanded endonasal approaches: vascular pedicle nasoseptal flap. *Laryngoscope*. 2006; 116:1882–1886. doi: [10.1097/01.mlg.0000234933.37779.e4](#) PMID: [17003708](#).
5. Kassam AB, Thomas A, Carrau RL, Snyderman CH, Vescan A, Prevedello D, et al. Endoscopic reconstruction of the cranial base using a pedicled nasoseptal flap. *Neurosurgery*. 2008; 63:ONS44–52; discussion ONS52–43. doi: [10.1227/01.neu.0000335010.53122.75](#) PMID: [18728603](#).
6. Alobod I, Ensenat J, Marino-Sanchez F, Rioja E, de Notaris M, Mullol J, et al. Expanded endonasal approach using vascularized septal flap reconstruction for skull base tumors has a negative impact on sinonasal symptoms and quality of life. *Am J Rhinol Allergy*. 2013; 27:426–431. doi: [10.2500/ajra.2013.27.3932](#) PMID: [24119608](#).
7. de Almeida JR, Snyderman CH, Gardner PA, Carrau RL, Vescan AD. Nasal morbidity following endoscopic skull base surgery: a prospective cohort study. *Head Neck*. 2011; 33:547–551. doi: [10.1002/hed.21483](#) PMID: [20824807](#).
8. Rivera-Serrano CM, Snyderman CH, Gardner P, Prevedello D, Wheless S, Kassam AB, et al. Nasoseptal "rescue" flap: a novel modification of the nasoseptal flap technique for pituitary surgery. *Laryngoscope*. 2011; 121:990–993. doi: [10.1002/lary.21419](#) PMID: [21520113](#).
9. Cappabianca P, Cavallo LM, Colao A, de Divitiis E. Surgical complications associated with the endoscopic endonasal transsphenoidal approach for pituitary adenomas. *J Neurosurg*. 2002; 97:293–298. doi: [10.3171/jns.2002.97.2.0293](#) PMID: [12186456](#).
10. Dusick JR, Esposito F, Mattozo CA, Chaloner C, McArthur DL, Kelly DF. Endonasal transsphenoidal surgery: the patient's perspective—survey results from 259 patients. *Surg Neurol*. 2006; 65:332–341, discussion 341–332. doi: [10.1016/j.surneu.2005.12.010](#) PMID: [16531188](#).
11. Kim BY, Kang SG, Kim SW, Hong YK, Jeun SS, Kim SW, et al. Olfactory changes after endoscopic endonasal transsphenoidal approach for skull base tumors. *Laryngoscope*. 2014; 124:2470–2475. doi: [10.1002/lary.24674](#) PMID: [24623575](#).
12. Kim BY, Son HL, Kang SG, Kim SW, Hong YK, Jeun SS, et al. Postoperative nasal symptoms associated with an endoscopic endonasal transsphenoidal approach. *Eur Arch Otorhinolaryngol*. 2013; 270:1355–1359. doi: [10.1007/s00405-012-2226-x](#) PMID: [23081674](#).
13. Kim BY, Shin JH, Kang SG, Kim SW, Hong YK, Jeun SS, et al. Bilateral modified nasoseptal "rescue" flaps in the endoscopic endonasal transsphenoidal approach. *Laryngoscope*. 2013; 123:2605–2609. doi: [10.1002/lary.24098](#) PMID: [23553463](#).
14. Cain WS, Gent JF, Goodspeed RB, Leonard G. Evaluation of olfactory dysfunction in the Connecticut Chemosensory Clinical Research Center. *Laryngoscope*. 1988; 98:83–88. doi: [10.1288/00005537-198801000-00017](#) PMID: [3336267](#).
15. Doty RL, Marcus A, Lee WW. Development of the 12-item Cross-Cultural Smell Identification Test (CC-SIT). *Laryngoscope*. 1996; 106:353–356. PMID: [8614203](#).
16. Kahveci OK, Miman MC, Yucel A, Yucedag F, Okur E, Altuntas A. The efficiency of Nose Obstruction Symptom Evaluation (NOSE) scale on patients with nasal septal deviation. *Auris Nasus Larynx*. 2012; 39:275–279. doi: [10.1016/j.anl.2011.08.006](#) PMID: [21885221](#).
17. Stewart MG, Witsell DL, Smith TL, Weaver EM, Yueh B, Hannley MT. Development and validation of the Nasal Obstruction Symptom Evaluation (NOSE) scale. *Otolaryngol Head Neck Surg*. 2004; 130:157–163. doi: [10.1016/j.otohns.2003.09.016](#) PMID: [14990910](#).
18. Balaker AE, Bergsneider M, Martin NA, Wang MB. Evolution of sinonasal symptoms following endoscopic anterior skull base surgery. *Skull Base*. 2010; 20:245–251. doi: [10.1055/s-0030-1249248](#) PMID: [21311617](#).
19. Escada PA, Lima C, da Silva JM. The human olfactory mucosa. *Eur Arch Otorhinolaryngol*. 2009; 266:1675–1680. doi: [10.1007/s00405-009-1073-x](#) PMID: [19714350](#).
20. Shin JH, Kang SG, Kim SW, Hong YK, Jeun SS, Kim EH, et al. Bilateral nasoseptal flaps for endoscopic endonasal transsphenoidal approach. *J Craniofac Surg*. 2013; 24:1569–1572. doi: [10.1097/SCS.0b013e31829a8105](#) PMID: [24036728](#).
21. Damm M, Vent J, Schmidt M, Theissen P, Eckel HE, Lotsch J, et al. Intranasal volume and olfactory function. *Chem Senses*. 2002; 27:831–839. PMID: [12438209](#).



22. Hornung DE, Leopold DA. Relationship between uninasal anatomy and uninasal olfactory ability. *Arch Otolaryngol Head Neck Surg.* 1999; 125:53–58. PMID: [9932588](#).
23. Leopold DA. The relationship between nasal anatomy and human olfaction. *Laryngoscope.* 1988; 98:1232–1238. doi: [10.1288/00005537-198811000-00015](#) PMID: [3185078](#).
24. Eccles R. Nasal airflow in health and disease. *Acta Otolaryngol.* 2000; 120:580–595. PMID: [11039867](#).
25. Kim SK, Na Y, Kim JI, Chung SK. Patient specific CFD models of nasal airflow: overview of methods and challenges. *J Biomech.* 2013; 46:299–306. doi: [10.1016/j.jbiomech.2012.11.022](#) PMID: [23261244](#).
26. Schroeter JD, Kimbell JS, Asgharian B. Analysis of particle deposition in the turbinate and olfactory regions using a human nasal computational fluid dynamics model. *J Aerosol Med.* 2006; 19:301–313. doi: [10.1089/jam.2006.19.301](#) PMID: [17034306](#).
